# Supplementary material for: A core–shell carbon–ceramic fibrous aerogel derived from aramid-polysilsesquioxane for broadband electromagnetic wave absorption
Source: Royal Society of Chemistry journal article supplement (doi:10.1039/d5tc01397f), 2025-01-01
Supplement: d5tc01397f1.pdf [file d5tc01397f1.pdf]

# **Core-Shell Carbon-Ceramic Fibrous Aerogel Derived from Aramid-Polysilsesquioxane for Broadband Electromagnetic Wave Absorption**

WeiQuan Huang<sup>a</sup>, Yihang Yang<sup>a</sup>, Huiyuan Gu<sup>a</sup>, Wenjing Yu<sup>b,\*</sup>, Gaofeng Shao<sup>a,\*</sup>

a. School of Chemistry and Materials Science, Jiangsu Key Laboratory of New Energy Devices and Interface Science, Nanjing University of Information Science & Technology, Nanjing 210044, China.

b School of Mathematics and Physics, Jiangsu University of Technology, Changzhou 213001, China.

Email: yuwj@jsut.edu.cn, gfshao@nuist.edu.cn

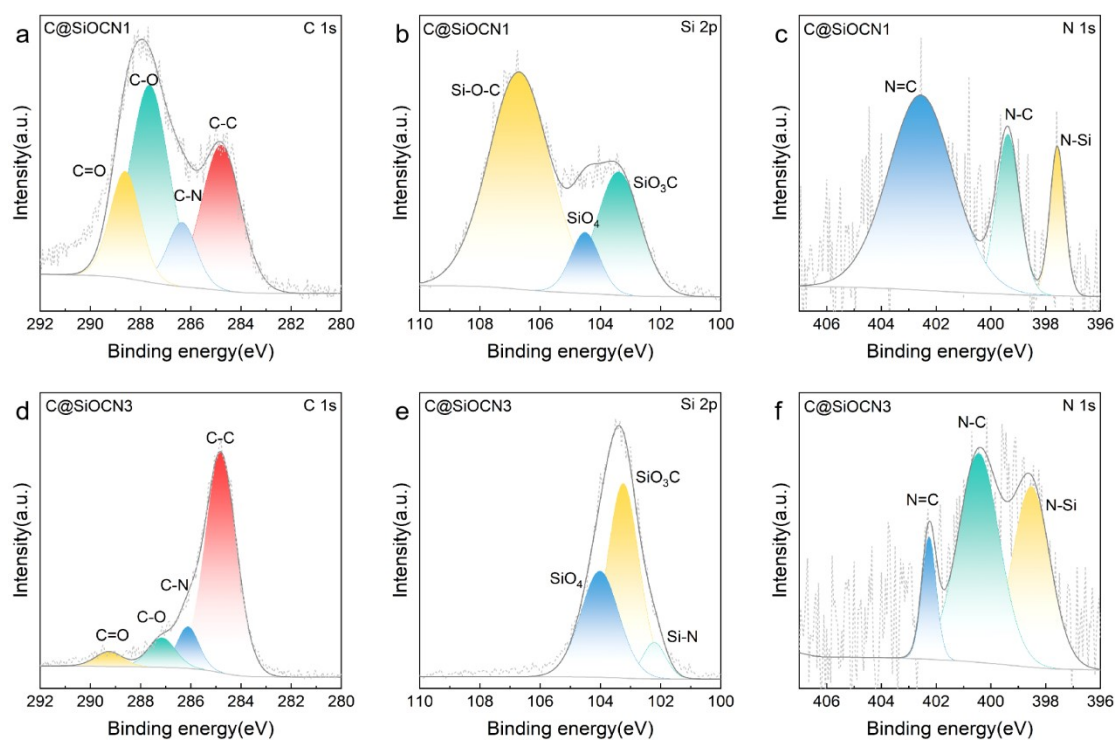

Figure S1. High-resolution XPS spectra for (a,d) C 1s, (b,e) Si 2p and (c,f) N 1s of C@SiOCN1 and C@SiOCN3 aerogels.

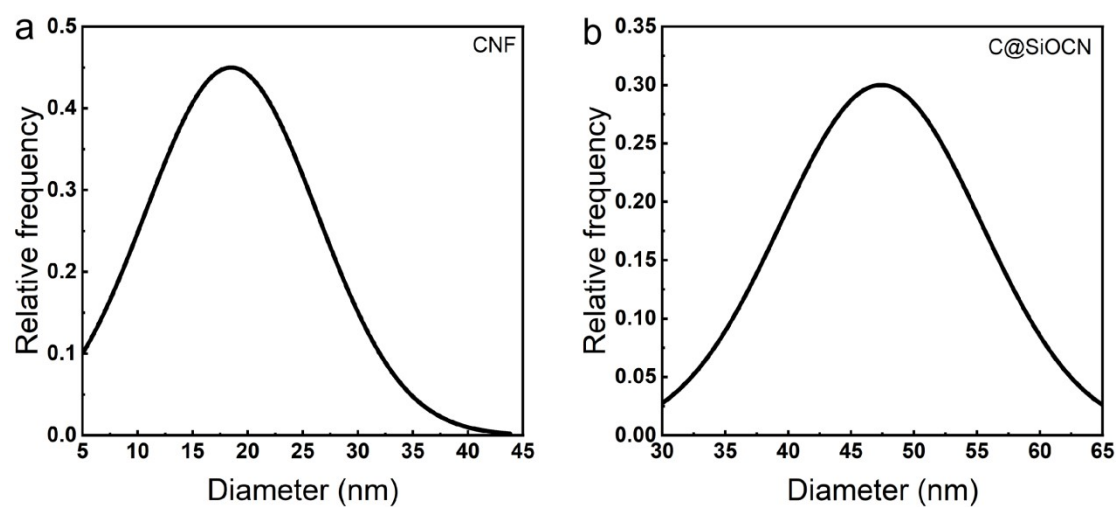

Figure S2. Diameter statistical distribution images of nanowires in (a) CNF and (b) C@SiOCN.

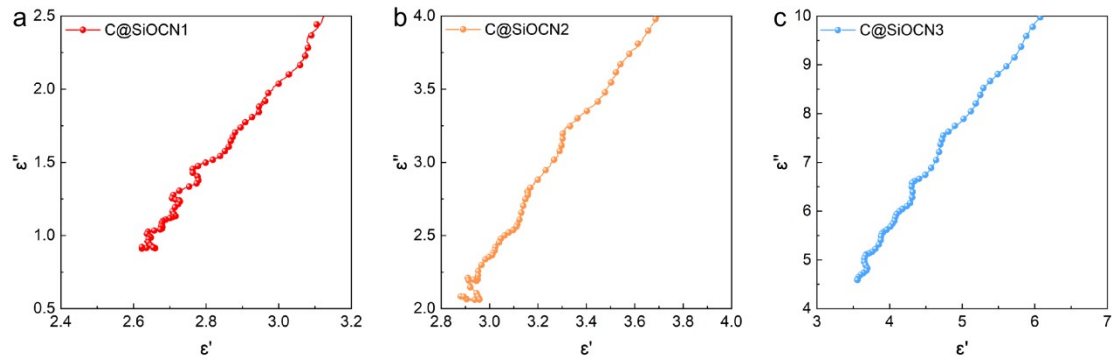

Figure S3. Enlarged images of the low-frequency region in the Cole-Cole curve for the (a) C@SiOCN1, (b) C@SiOCN2 and (c) C@SiOCN3 aerogel.

Table S1. Comparison of the microwave absorption performance of the previously reported carbon-ceramic based absorbers.

| Materials                                    | Thickness/mm | EAB/GHz | Refs.     |
|----------------------------------------------|--------------|---------|-----------|
| SiC aerogel                                  | 3.3          | 6.7     | S1        |
| SiC aerogel                                  | 3.75         | 5.5     | S2        |
| SiC aerogel                                  | 3.59         | 6.24    | S3        |
| SiC-based nanofibrous aerogel                | 2.8          | 4.5     | S4        |
| C/SiC nanofiber aerogel                      | 3            | 4.8     | S5        |
| SiC/Si <sub>3</sub> N <sub>4</sub> aerogel   | 2            | 7.4     | S6        |
| SiC fiber aerogel                            | 2.4          | 7.2     | S7        |
| SiBCN/Al <sub>2</sub> O <sub>3</sub> aerogel | 2.2          | 5.8     | S8        |
| SiBCN/SiBCN nano fiber aerogel               | 2            | 5.6     | S9        |
| SiBCN/SiC nanowire aerogel                   | 2            | 6.4     | S10       |
| C/SiC/SiBCN composite aerogel                | 2            | 5.3     | S11       |
| SiOCN ceramic aerogel                        | 2.15         | 5.4     | S12       |
| SiCN ceramic aerogel                         | 4            | 3.8     | S13       |
| SiOC ceramic aerogel                         | 2.45         | 6       | S14       |
| C/SiOC composite aerogel                     | 2.37         | 6.88    | S15       |
| C/SiOC aerogel                               | 2            | 4.92    | S16       |
| C@SiOCN aerogel                              | 3.45         | 8.24    | This work |

## References

- [S1] Yan M, Pan Y, He P, Gong L, Fu Y, Zhang H, et al. Mechanically strong SiC aerogels with broadband electromagnetic wave absorption enabled by hollow skeleton and interface engineering. *Chemical Engineering Journal*. 2024;497.
- [S2] Wang Z, Zhao H, Dai D, Hao H, Wang Z. Ultralight, tunable monolithic SiC aerogel for electromagnetic absorption with broad absorption band. *Ceramics International*. 2022;48(18):26416-24.
- [S3] Liu J, Wang Z, Hao H, Jing Q, Yan S, Guo J, et al. Nanopore construction in SiC aerogels for continuous dual-peak electromagnetic wave absorption with full Ku-band coverage. *Carbon*.

2024;224.

[S4] Zhang B, Tong Z, Wang X, Chen X, Wen X, Ma C. Zirconium-modified hierarchical porous SiC-based nanofibrous aerogel with efficient electromagnetic waves absorption and thermal insulation properties. *Journal of the European Ceramic Society*. 2025;45(1).

[S5] Song M, Yan L, Li Y, Jiang J, Gong Z, Guo A, et al. Thermal insulated C/SiC nanofiber aerogel with high thermal stability and superior electromagnetic wave absorption performance. *Ceramics International*. 2024;50(16):28907-17.

[S6] Wang L, Cai Z, Su L, Niu M, Peng K, Zhuang L, et al. Bifunctional SiC/Si<sub>3</sub>N<sub>4</sub> aerogel for highly efficient electromagnetic wave absorption and thermal insulation. *Journal of Advanced Ceramics*. 2023;12(2):309-20.

[S7] Quan J, Lan X, Lim GJH, Hou Y, Yang Y, Khoo BC. Hierarchical SiC fiber aerogel toward microwave attenuation and thermal insulation application. *Journal of Alloys and Compounds*. 2022;911.

[S8] Jiang J, Yan L, Li J, Xue Y, Zhang C, Hu X, et al. Lightweight, thermally insulating SiBCN/Al<sub>2</sub>O<sub>3</sub> ceramic aerogel with enhanced high-temperature resistance and electromagnetic wave absorption performance. *Chemical Engineering Journal*. 2024;501.

[S9] Jiang J, Xue Y, Li J, Zhang C, Hu X, Yan L, et al. Microwave absorption and thermal insulation integrated polymer-derived SiBCN/SiBCN<sub>nf</sub> ceramic aerogel with enhanced mechanical property. *Ceramics International*. 2024;50(21):41527-33.

[S10] Jiang J, Yan L, Xue Y, Li J, Zhang C, Hu X, et al. Lightweight and thermally insulating polymer-derived SiBCN/SiC<sub>nw</sub> ceramic aerogel with enhanced electromagnetic wave absorbing performance. *Chemical Engineering Journal*. 2024;482.

[S11] Jiang J, Yan L, Song M, Li Y, Guo A, Du H, et al. Thermally insulated C/SiC/SiBCN composite ceramic aerogel with enhanced electromagnetic wave absorption performance. *Ceramics International*. 2025;51(1):17-24.

[S12] Shao G, Ding C, Yu G, Xu R, Huang X. Bridged polysilsesquioxane-derived SiOCN ceramic aerogels for microwave absorption. *Journal of the American Ceramic Society*. 2022;106(4):2407-19.

[S13] Yuan K, Han D, Zhao W, Zhang W, You G, Li M, et al. Structure regulation and microwave absorption property of SiCN ceramic aerogels produced by catalytic pyrolysis. *Ceramics International*. 2021;47(22):31561-6.

[S14] Zhang J, Zou J, Li Q, Wang Y, Cui S, Yang J, et al. Nano-turbostratic carbon-decorated SiOC ceramic aerogels with ultra-broadband electromagnetic wave absorption properties. *Journal of Non-Crystalline Solids*. 2024;624.

[S15] Yang D, Dong S, Xin J, Liu C, Hu P, Xia L, et al. Robust and thermostable C/SiOC composite aerogel for efficient microwave absorption, thermal insulation and flame retardancy. *Chemical Engineering Journal*. 2023;469.

[S16] Yang D, Dong S, Cui T, Xin J, Xu X, Chen J, et al. Multifunctional Carbon Fiber Reinforced C/SiOC Aerogel Composites for Efficient Electromagnetic Wave Absorption, Thermal Insulation, and Flame Retardancy. *Small*. 2023;20(23).
